# Supplementary material for: The Construction of the Self-Induced Sal System and Its Application in Salicylic Acid Production
Source: MDPI journal article supplement (doi:10.3390/molecules28237825), 2023-11-28
Supplement: s1 [file s1]

## Supplementary materials

**Table S1. Strains used in this study.**

| Strains                  | Description                                                                                                                      | Source     |
|--------------------------|----------------------------------------------------------------------------------------------------------------------------------|------------|
| <i>E. coli</i> TOP10     | <i>F- mcrAΔ(mrr-hsdRMS-mcrBC)</i><br><i>φ80lacZΔM15ΔlacX74nupG recA1 araD139Δ(ara-leu)7697 galE15 galK16 rpsL(StrR) endA1 λ-</i> | Lab stock  |
| SalA                     | <i>E. coli</i> TOP10 harboring pSalA-30                                                                                          | This study |
| SalB-1                   | <i>E. coli</i> TOP10 harboring pSalB-1                                                                                           | This study |
| J23104-30- <i>gfp</i>    | <i>E. coli</i> TOP10 harboring pJ23104-30- <i>gfp</i>                                                                            | This study |
| J23104-35- <i>gfp</i>    | <i>E. coli</i> TOP10 harboring pJ23104-35- <i>gfp</i>                                                                            | This study |
| J23104*-30- <i>gfp</i>   | <i>E. coli</i> TOP10 harboring pJ23104*-30- <i>gfp</i>                                                                           | This study |
| SalB-2                   | <i>E. coli</i> TOP10 harboring pSalB-2                                                                                           | This study |
| SalB-3                   | <i>E. coli</i> TOP10 harboring pSalB-3                                                                                           | This study |
| SalC                     | <i>E. coli</i> TOP10 harboring pSal-C                                                                                            | This study |
| StrainG-sRNA- <i>gfp</i> | <i>E. coli</i> TOP10 harboring pGFP-MicC1                                                                                        | This study |
| Sal-Strain1              | <i>E. coli</i> TOP10 harboring pSal1                                                                                             | This study |
| ppc2-Strain1             | <i>E. coli</i> TOP10 harboring pSal1-ppc2                                                                                        | This study |
| ppc3-Strain1             | <i>E. coli</i> TOP10 harboring pSal1-ppc3                                                                                        | This study |

**Table S2. Plasmids used in this study.**

| Plasmids                | Description                                                                                                               | Source     |
|-------------------------|---------------------------------------------------------------------------------------------------------------------------|------------|
| pSalA                   | CmR, P <sub>sal</sub> -RBS 30- <i>gfp</i> , ori ColE1                                                                     | This study |
| pGFP-100                | CmR, BBa_J23100-RBS 30- <i>gfp</i> , ori ColE1                                                                            | This study |
| pSalB-1                 | CmR, BBa_J23104-RBS 30- <i>nahR</i> , P <sub>sal</sub> -RBS 30- <i>gfp</i> , ori ColE1                                    | This study |
| pJ23104-30- <i>gfp</i>  | CmR, BBa_J23104-RBS 30- <i>gfp</i> , ori ColE1                                                                            | This study |
| pJ23104-35- <i>gfp</i>  | CmR, BBa_J23104-RBS 35- <i>gfp</i> , ori ColE1                                                                            | This study |
| pJ23104*-30- <i>gfp</i> | CmR, BBa_J23104-RBS 30- <i>gfp</i> , ori ColE1                                                                            | This study |
| pSalB-2                 | CmR, BBa_J23104-RBS 35- <i>nahR</i> , P <sub>sal</sub> -RBS 30- <i>gfp</i> , ori ColE1                                    | This study |
| pSalB-3                 | CmR, BBa_J23104*-RBS 30- <i>nahR</i> , P <sub>sal</sub> -RBS 30- <i>gfp</i> , ori ColE1                                   | This study |
| pSalC                   | CmR, BBa_J23100-RBS 34- <i>pchBA</i> , BBa_J23104*-RBS 30- <i>nahR</i> , P <sub>sal</sub> -RBS 30- <i>gfp</i> , ori ColE1 | This study |
| pGFP-MicC1              | CmR, BBa_J23100-RBS 34- <i>pchBA</i> , BBa_J23104*-RBS 30- <i>nahR</i> , P <sub>sal</sub> -MicC1- <i>gfp</i> , ori ColE1  | This study |
| pSal1                   | CmR, BBa_J23100-RBS 34- <i>pchBA</i> , ori ColE1                                                                          | This study |
| pSal1-ppc2              | CmR, BBa_J23100-RBS 34- <i>pchBA</i> , BBa_J23104*-RBS 30- <i>nahR</i> , P <sub>sal</sub> -MicC1-ppc2, ori ColE1          | This study |

|            |                                                                                                         |            |
|------------|---------------------------------------------------------------------------------------------------------|------------|
| pSal1-ppc3 | CmR, BBa_J23100-RBS 34- <i>pchBA</i> , BBa_J23104*-<br>RBS 30- <i>nahR</i> , Psa1-MicC1-ppc3, ori ColE1 | This study |
|------------|---------------------------------------------------------------------------------------------------------|------------|

**Table S3. Primers used in this study.**

| Primer name | Sequences (5'-3')                                                                                          |
|-------------|------------------------------------------------------------------------------------------------------------|
| B-pTra*-R   | GTGATGACGGTGAAAACCTCTGAC                                                                                   |
| B-pTra*-F   | CTAGAGATTAAAGAGGAGAAATACTAGATGCGTAAAGGAGA<br>AGAACT                                                        |
| Psa1-F      | GCATGTGTCAGAGGTTTTACCGTCATCACGGGGCCTCGCTT<br>GGGTTATT                                                      |
| Psa1-R      | CATCTAGTATTTCTCCTCTTTAATCTCTAGGATCCTCTATGGT<br>ACTCGTG                                                     |
| B-pSalA-R   | CTAGgctagcactgtacctaggactgagctagccgtaaGTGATGACGGTGAAAA<br>CCTC                                             |
| B-pSalA-F   | agctcagtcctaggtacagtgtagcCTAGAGATTAAAGAGGAGAAATACT<br>AGATGCGTAAAGGAGAAGAACT                               |
| B-pSalC-1   | GAAAAAATCCGAGCCGATCA                                                                                       |
| B-pSalC-2   | aaacgaagatcaaaacgaccgagcgc                                                                                 |
| B-pSalC-3   | TCTTTCTCTAGAgctagcactgtacctaggactgagctagccgtaaGATGGTAAG<br>CCCTCCCGTAT                                     |
| B-pSalC-4   | TAATCTCTAGAGCTAGCACAAATACCTAGGACTAGCTAGCTGT<br>CAAGTGATGACGGTGAAAACCTC                                     |
| nahR-R      | CCCATCACATTGATCGGCTCGGATTTTTTCTTAATCGGTAAAC<br>AGATCAAAC                                                   |
| pchBA-F     | cgctgcgctcggtcgtttgatcttcgttttcagcgacgcgcgctgca                                                            |
| pchBA-R     | cctaggtacagtgtagcTCTAGAGAAAGAGGAGAAATACTAGATGgcta<br>tgaaaactcccgaagactg                                   |
| nahR-F      | TCCTAGGTATTGTGCTAGCTCTAGAGATTAAAGAGGAGAATA<br>CTAGATGATGGAAGTGCCTGATCTGGA                                  |
| B-ppc2-R    | GATCCTCTATGGTACTCGTG                                                                                       |
| B-ppc2-F    | ttaagaccgcccgtcttctgc                                                                                      |
| ppc2-R      | caaggtagtggacaagaccggcggtcttaaTATAAACGCAGAAAGGCCCA<br>ATAAAGCCATCACGAGTACCATAGAGGATCatgaacgaacaattccg<br>c |
| ppc2-F      |                                                                                                            |
| B-ppc3-R    | CAGAAAcctttcggcgaaatgctgtggtatGATCCTCTATGGTACTCGTG                                                         |
| ppc3-F      | ataccacagcatttcgccgaaaggTTTCTGTTGGGCCATTGCAT                                                               |

**Table S4. The detailed promoter information.**

| Promoters        | Sequences (5'-3')                                                                                                                                                       |
|------------------|-------------------------------------------------------------------------------------------------------------------------------------------------------------------------|
| BBa_J23100       | TTGACGGCTAGCTCAGTCCTAGGTACAGTGCTAGC                                                                                                                                     |
| P <sub>sal</sub> | GGGGCCTCGCTTGGGTTATTGCTGGTGCCCGGCCGGGCGCAA<br>TATTCATGTTGATGATTTATTATATATCGAGTGGTGTATTTATCA<br>ATATTGTTTGCTCCGTTATCGTTATTAACAAGTCATCAATAAAG<br>CCATCACGAGTACCATAGAGGATC |
| BBa_J23104       | TTGACAGCTAGCTCAGTCCTAGGTATTGTGCTAGC                                                                                                                                     |
| BBa_J23104*      | TTGACAGCTAGCTAGTCCTAGGTATTGTGCTAGC                                                                                                                                      |

**Table S5. Sequences used in this study.**

| Genes        | Sequences (5'-3')                                                                                                                                                                                                                                                                                                                                                                                                                                                                                                                                                                                                                                                                                                                                                                                                                                                                                                                                                                                                                                                                                                                                                                                                                                                                                                                                                                                                                                                                                                                                                                                                                                                                                                                                                                                                                                                |
|--------------|------------------------------------------------------------------------------------------------------------------------------------------------------------------------------------------------------------------------------------------------------------------------------------------------------------------------------------------------------------------------------------------------------------------------------------------------------------------------------------------------------------------------------------------------------------------------------------------------------------------------------------------------------------------------------------------------------------------------------------------------------------------------------------------------------------------------------------------------------------------------------------------------------------------------------------------------------------------------------------------------------------------------------------------------------------------------------------------------------------------------------------------------------------------------------------------------------------------------------------------------------------------------------------------------------------------------------------------------------------------------------------------------------------------------------------------------------------------------------------------------------------------------------------------------------------------------------------------------------------------------------------------------------------------------------------------------------------------------------------------------------------------------------------------------------------------------------------------------------------------|
| <i>pchBA</i> | atgaaaactcccgaagactgcaccggcctggcggacatccgcgaggccatcgaccggatcgacct<br>ggatatcgtccaggccctcggccgcatggactacgtcaaggcggcgctcgcgtcaaggccag<br>cgaggcggcgattccggcgcccgagcgggtcgccgcgatgctccccgagcgcgcccgctggggc<br>gaggaaaacggactcgacgcgcccttcgtcaggggactgtcgcgcagatcatccactggtacatcg<br>ccgagcagatcaagtactggcgccagacacggggtgcccatgagccggctggcgccctgagcc<br>agtgcctgcacgccttcgcgggcaccttcgagcgcgccatcgccaggcgaggcgctcgatcgtc<br>cgggtcgtggtggcgccatcgttcgagatcgaccattggaccgctgcaggtattcggctggcctggga<br>cgaccggcacaacgccctgcctgtactgggaacagcccagctggcggttcttcgctggggctgcgc<br>cctggagctgcaaggccacggcgaacagcgcttcgccggatcgaggaaaactggcaattgctctg<br>cgccgacgccgtggtcgaggggcccgctggcgccgcgctgtgcggcggttccgcttcgatccgc<br>gogggccgcgcgaggaacactggcaagccttcgccgatccagcctgatgctcgccggcatcacc<br>gtgctgcgcgagggcgaacgctaccgggtactctgccaacacctggccaagcccggaagatgc<br>cctggccctggccgctaccactgctcggcgctactgcgcctgaggcagccggccagacgccggc<br>cctcggggccgaccgctggcgcgaggggcgacgcttcggcgagggagcgaggcaatgggaag<br>ccaaggtgagcgacgcggttaagcagtgctccgaggacgcttcggcaaggtcgtgctggccgc<br>accaggcccgccctcgcggcagatcgagccgtggcaggtcatcgaacacctgcgtctgaacat<br>gccgacgccagctgttcgctgtcgccgcggcaacgcctgttcctcggcgcctccccggaacgc<br>ctggtccgcatcgcgccggcgaggcactaccatgccctggccgggaccatcgcccgcgcggg<br>cgatgccaggaagatgcgcggctcgacaggccctgtggacagcgccaaggacaggcagaa<br>caccagttggtggtgagggcgatccgtacggccctggaaccttcagcgagggtgctgaaatccc<br>gatgcgccggcctgaaacgactggcgcgagtccagcacctgaacacgccgatccgcgccgcct<br>cgctgacgcaggcggcatcctgcggctgctacaagcgtgcatccgacccccgcggtggcgggct<br>accacgcagcgcgggcgtggactacatccgccagcacgaaggatggaccgcggctggtacgc<br>cgcgccgctgggctggctcgacggcgaaggcaacggcgattcctggtggcgctgcgctcgccct<br>gtcacgcccgggcccgggtacctgttcgccggctgcggctggttaggcgattcggaaacggccca<br>cgagtatcgcaaacctgccttaagctcagtgccatgcgggaagctctatcccatagggcgccgtg<br>gacgaagtgccttgacgcggcggtgcctga |
| <i>nahR</i>  | ATGGAAGTGCCTGATCTGGATCTGAATCTGCTGGTTGTGTTTA<br>ATCAGCTGCTGGTGGATCGTCGCGTTAGTGTTACCGCAGAAAA<br>TCTGGGTCTGACCCAGCCGGCAGTGAGTAATGCACTGAAACG<br>TCTGCGCACCAGTCTGCAAGATCCGCTGTTTGTGCGTACCCAT<br>CAGGGCATGGAACCGACCCCGTATGCAGCACATCTGGCCGAA                                                                                                                                                                                                                                                                                                                                                                                                                                                                                                                                                                                                                                                                                                                                                                                                                                                                                                                                                                                                                                                                                                                                                                                                                                                                                                                                                                                                                                                                                                                                                                                                                            |

CCTGTTACCAGCGCAATGCATGCCCTGCGCAATGCACTGCAAC  
ATCATGAAAGTTTTGATCCGCTGACCAGTGAACGTACCTTTAC  
CCTGGCAATGACCGATATTGGCGAAATCTATTTTATGCCGCGCC  
TGATGGATGTTCTGGCCCATCAGGCACCGAATTGCGTTATTAG  
CACCGTGCGTGATAGTAGCATGAGTCTGATGCAGGCCCTGCAA  
AATGGCACCGTGGATCTGGCCGTTGGTCTGCTGCCGAATCTGC  
AAACCGGCTTTTTCCAGCGTCGCCTGCTGCGTAATCATTATGTT  
TGTCTGTGCCGTAAAGATCATCCGGTTACCCGTGAACCGCTGA  
CCCTGGAACGCTTTTGTAGTTATGGTCATGTGCGTGTTATTGCA  
GCCGGCACCGGCCACGGTGAAGTGGATACCTATATGACCCGC  
GTTGGCATTTCGTCGCGATATTCGTCTGGAAGTTCCGCATTTTGC  
AGCAGTTGGTCATATTCTGCAACGCACCGATCTGCTGGCAACC  
GTGCCGATTTCGTCTGGCCGATTGCTGTGTGGAACCGTTTGGCC  
TGAGTGCACTGCCGCATCCGGTGGTTCTGCCGGAAATTGCAAT  
TAATATGTTTTGGCATGCAAAGTATCACAAGATTTGGCAAATA  
TTTGGCTGCGTCAGCTGATGTTTGATCTGTTTACCGATTAA

*gfp*

ATGCGTAAAGGAGAAGAAGTCTTTTCACTGGAGTTGTCCCAATTC  
TTGTTGAATTAGATGGTGATGTTAATGGGCACAAATTTTCTGTC  
AGTGGAGAGGGTGAAGGTGATGCAACATACGGAAAAGTACC  
CTTAAATTTATTTGCACTACTGGAAAAGTACCTGTTCCATGGCC  
AACACTTGTCACTACTTTCGGTTATGGTGTTCATGCTTTGCGA  
GATACCCAGATCATATGAAACAGCATGACTTTTTCAAGAGTGC  
CATGCCCCGAAGGTTATGTACAGGAAAGAACTATATTTTCAAA  
GATGACGGGAAGTACAAGACACGTGCTGAAGTCAAGTTTGAA  
GGTGATACCCTTGTTAATAGAATCGAGTTAAAAGGTATTGATTT  
TAAAGAAGATGGAAACATTCTTGGACACAAATTGGAATACAA  
CTATAACTCACACAATGTATACATCATGGCAGACAAACAAAAG  
AATGGAATCAAAGTTAACTTCAAAATTAGACACAACATTGAAG  
ATGGAAGCGTTCAACTAGCAGACCATTATCAACAAAATACTCC  
AATTGGCGATGGCCCTGTCCTTTTACCAGACAACCATTACCTG  
TCCACACAATCTGCCCTTTCGAAAGATCCCAACGAAAAGAGA  
GACCACATGGTCCTTCTTGAGTTTGTAACAGCTGCTGGGATTA  
CACATGGCATGGATGAACTATACAAATAA

*ppc2*

GGGGCCTCGCTTGGGTTATTGCTGGTGCCCGGCCGGGCGCAAT  
ATTCATGTTGATGATTTATTATATATCGAGTGGTGTATTTATCAAT  
ATTGTTTGCTCCGTTATCGTTATTAACAAGTCATCAATAAAGCC  
ATCACGAGTACCATAGAGGATCATGAACGAACAATATTCCGCA  
TTGTTTCTGTTGGGCCATTGCATTGCCACTGATTTTCCAACATA  
TAAAAAGACAAGCCCGAACAGTCGTCCGGGCTTTTTTtctgagC  
TCGAGCCAGGCATCAAATAAAACGAAAGGCTCAGTCGAAAGA  
CTGGGCCTTTCGTTTTATCTGTTTTTGTCTGGTGAACGCTCTCTA  
CTAGAGTCACACTGGCTCACCTTCGGGTGGGCCTTCTGCGTT  
TATA

ppc3

GGGGCCTCGCTTGGGTTATTGCTGGTGCCCGGCCGGGCGCAAT  
 ATTCATGTTGATGATTTATTATATATCGAGTGGTGTATTTATCAAT  
 ATTGTTTGCTCCGTTATCGTTATTAACAAGTCATCAATAAAGCC  
 ATCACGAGTACCATAGAGGATCATACCACAGCATTTCGCCGAA  
 AGGTTTCTGTTGGGCCATTGCATTGCCACTGATTTTCCAACATA  
 TAAAAAGACAAGCCCGAACAGTCGTCCGGGCTTTTTTtctgagC  
 TCGAGCCAGGCATCAAATAAAACGAAAGGCTCAGTCGAAAGA  
 CTGGGCCTTTCGTTTTATCTGTTTTTGTGCGGTGAACGCTCTCTA  
 CTAGAGTCACACTGGCTCACCTTCGGGTGGGCCTTCTGCGTT  
 TATA

The *atsRNA* is expressed under the control of the  $P_{sal}$  promoter (yellow sequence). The *atsRNA* target-binding sequence is inserted into the red region, which is 24 nucleotides long. Reliable inhibition of *atsRNA* is achieved by additional sequences (green sequences) bound by Hfq. The remaining part is the transcription terminator (T1/TE).

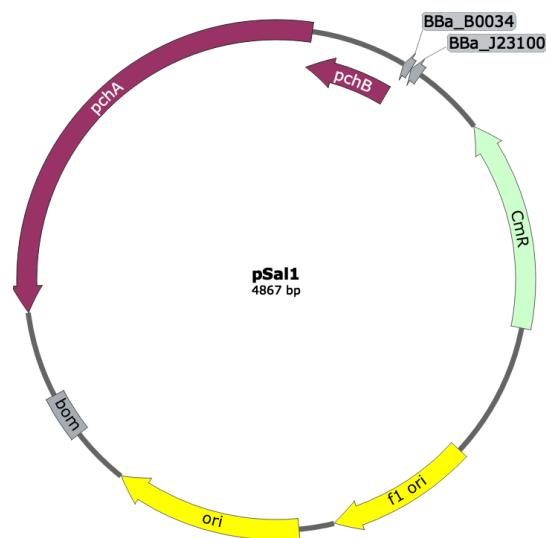

**Figure S1.** Plasmid map of plasmid pSal1. The vector of plasmid pSal1 is pETDuet-1, ColE1 replicon, chloramphenicol resistance, and the *pchBA* genes are constitutively expressed under the control of the BBa\_J23100 promoter sequence and the BBa\_B0034 RBS sequence.
